# Supplementary material for: County-Level Estimates of Mental Health Professional Supply in the United States
Source: Atypon-hosted journal article supplement (doi:10.1176/ps.2009.60.10.1315), 2009-10-01

## Number of full-time–equivalent mental health professionals needed in the United States, by county

Shading (from light to dark, indicating first to fourth quartiles, respectively) is intended to convey an overall pattern of need.

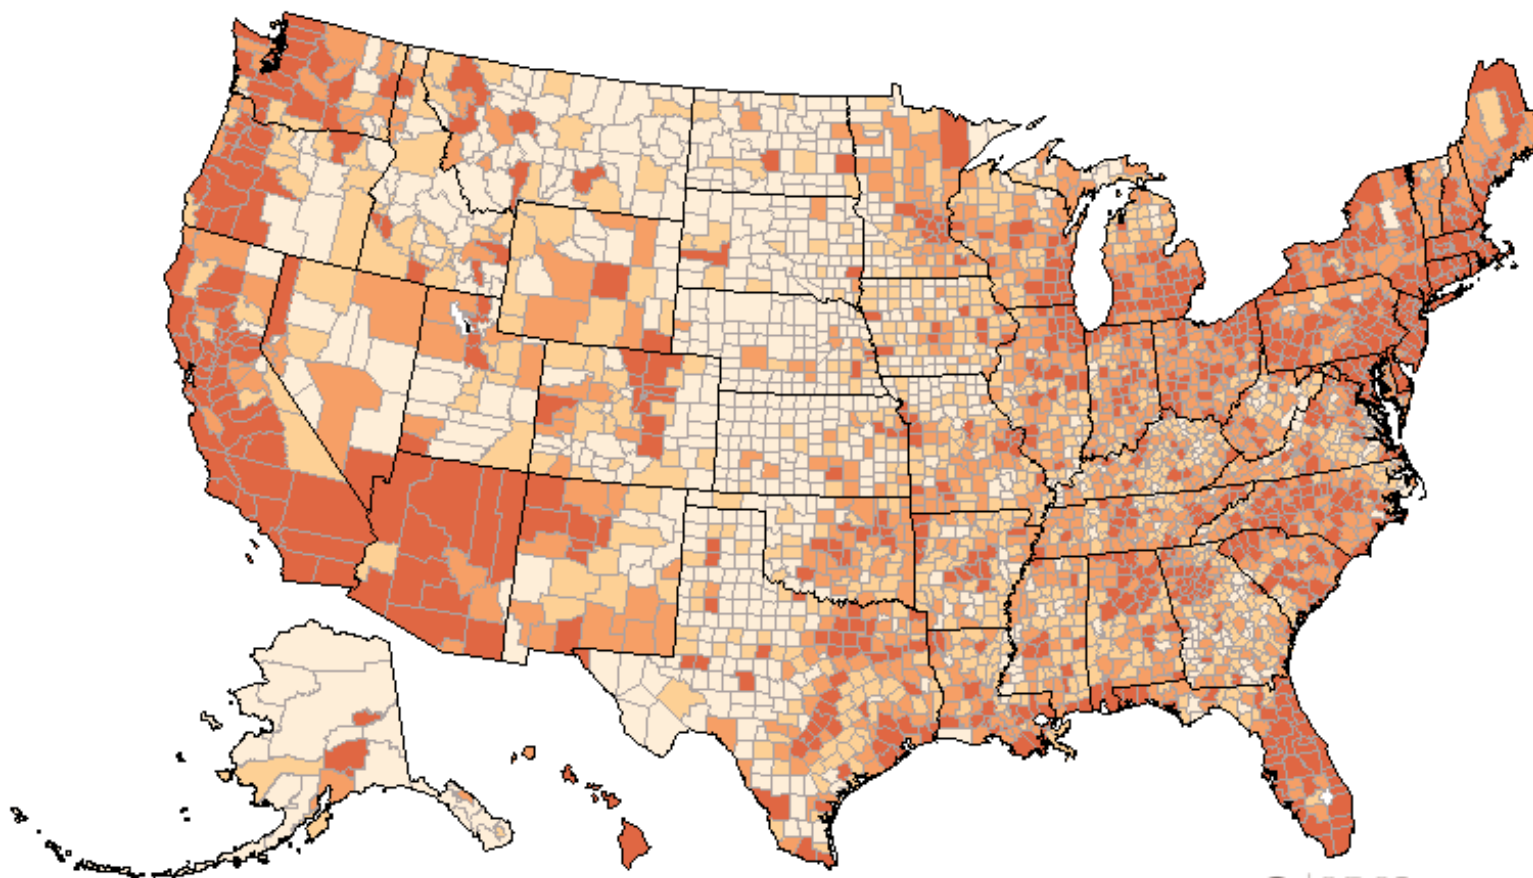

## Number of mental health professionals, by county, among counties with mental health professionals

Shading (from light to dark, indicating first to fourth quartiles, respectively) is intended to convey an overall pattern of supply.

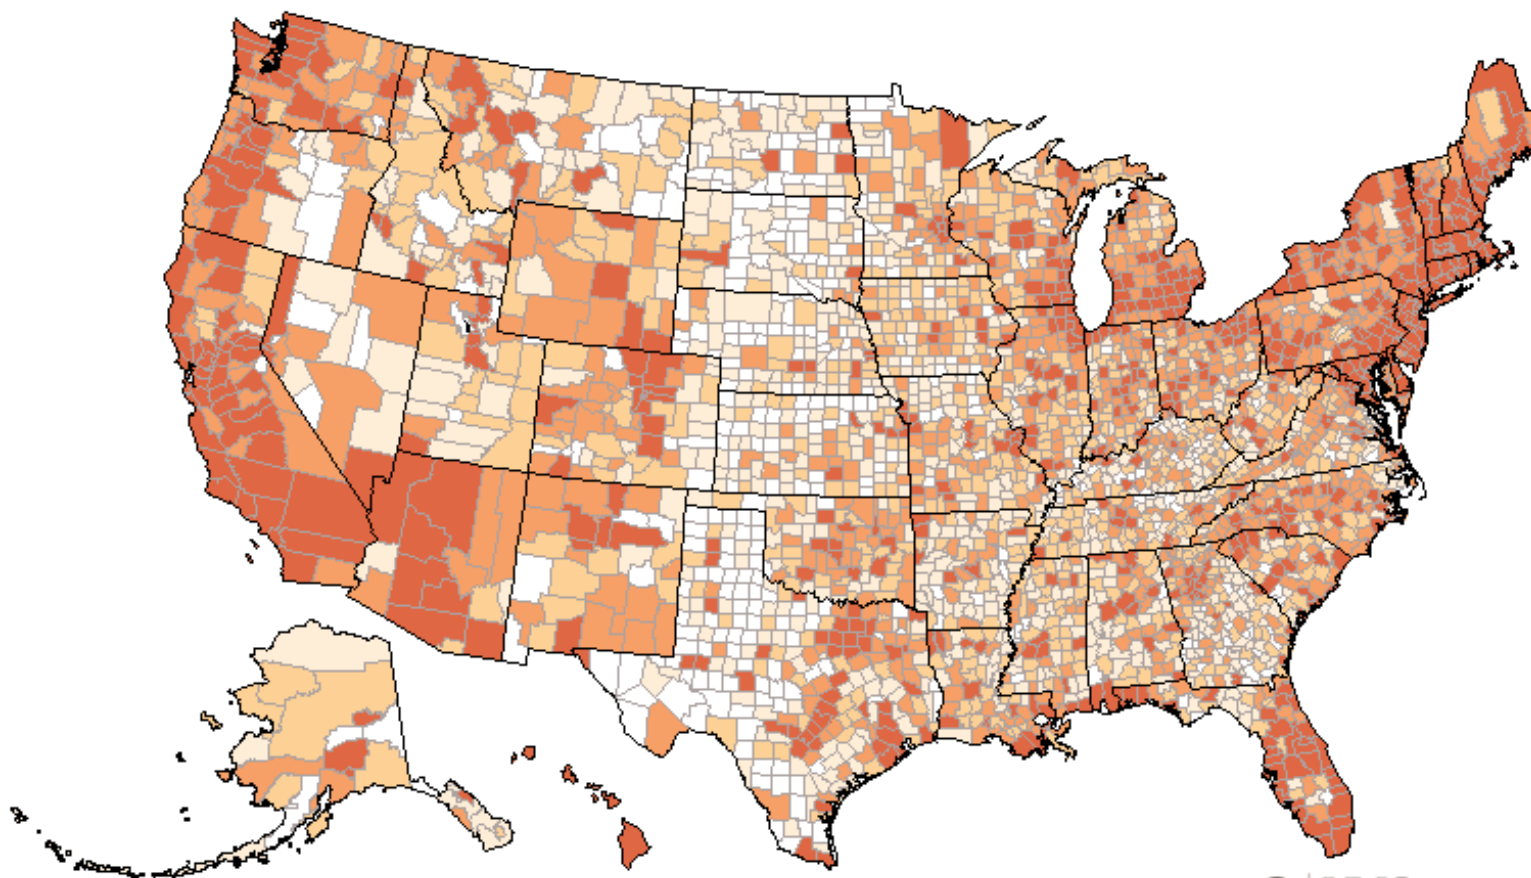

## Unmet need for mental health professionals among counties with an overall shortage

Shading (from light to dark, indicating first to fourth quartiles, respectively) is intended to convey an overall pattern of unmet need for prescribers and nonprescribers combined.

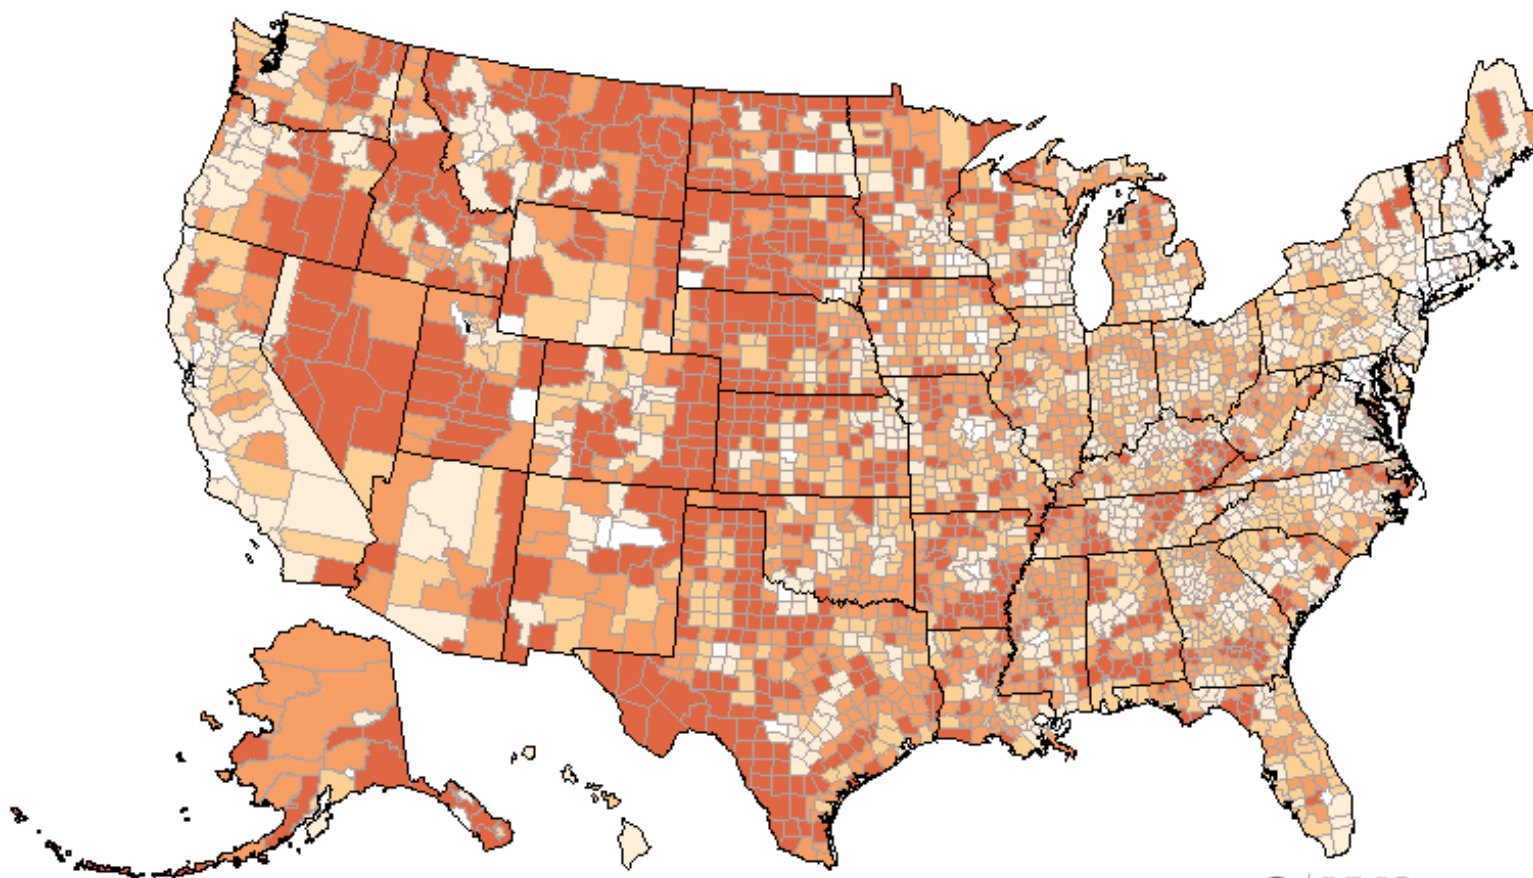

Supplement: pss_60_10_1315_01.pdf [file pss_60_10_1315_01.pdf]
